# Supplementary material for: Influence of gas flow on elemental analysis using a tandem femtosecond LIBS and LA-ICPMS system
Source: Royal Society of Chemistry journal article supplement (doi:10.1039/d5ja00338e), 2026-01-01
Supplement: d5ja00338e1.xlsx [file d5ja00338e1.xlsx]

## Sheet: fig.2 
LIBS spectral intensity of Li (I) 670.77 nm at various gas conditions
Average values of 10 shots	Gas type-1	Gas type-2	Gas type-3	Gas type-4	Gas type-5	Gas type-6	Gas type-7	Gas type-8	Gas type-9	Gas type-10	Gas type-11	Gas type-12
1	1810.73	2056.34	2359.74	2360.07	2640.5	2672.25	2996.75	3269.1	3590.62	3872.57	4642.9	4387.18
2	1843.1	2108.23	2360.19	2359.2	2542.62	2785.9	3018.38	3267.07	3572.65	3760.43	4530.5	4304.9
3	1930.53	2128.41	2344.53	2298.7	2533.93	2673.43	2912.1	3183.35	3495.25	3653.35	4511.38	4364.57
4	1965.53	2145.87	2344.17	2297.32	2476.7	2586.82	2883.38	3100.6	3382.8	3670.57	4367.35	4321.6
5	2000.19	2187.57	2372.64	2346	2519.62	2598.78	2854.2	3062.38	3432.28	3520.05	4366.45	4362.43
6	2076.09	2265.26	2457.26	2327.68	2544.57	2582.15	2846.5	3003	3467.32	3521.03	4263.43	4351.38
7	2158.59	2290.13	2501.2	2290.15	2530.55	2579.88	2799.15	2994.78	3459.8	3557.68	4232.77	4479.98
8	2155.59	2342.36	2533.1	2282.93	2470.53	2543.53	2722.32	2878.55	3490.72	3552.57	4263.15	4439.9
9	2189.11	2314.83	2523.09	2311.32	2492.3	2547.75	2700.82	2831.93	3434.53	3528.68	4211.4	4462.45
10	2204.66	2381.24	2497.34	2276.18	2546.93	2567.95	2639.38	2865.93	3499	3497.75	4048.82	4298.23
11	2220.41	2337	2507.34	2231.97	2538.3	2470.05	2594.53	2767.75	3424.7	3481.7	3910.15	4196.07
12	2213.57	2343.99	2470.97	2151.05	2433.43	2524.07	2573.15	2714.6	3274	3262.28	3788	4086.05
13	2210.49	2322.19	2462.21	2199.53	2404.05	2387.82	2550.35	2630	3164.2	3180.78	3642.1	3865.53
14	2163.93	2265.66	2395.67	2080.2	2314.2	2399.35	2372.95	2590.9	3014.72	3056.1	3498.15	3803.15
15	2122.99	2215.6	2368.84	2082.05	2298.12	2346.68	2397	2478.28	2961.12	2968.5	3378.45	3656.53
16	2072.84	2173.59	2324.63	2070.72	2290.18	2292.2	2293.62	2422.1	2871.4	2968.8	3342.5	3665.7
17	2018.51	2124.96	2260.46	2009.6	2251.75	2234.5	2207.1	2322.47	2843.78	2824.47	3119.12	3505.88
18	1933.8	2080.57	2219.74	1921.6	2148.07	2128.5	2241.18	2241.07	2694.72	2826.57	3157.72	3346.18
19	1934.74	2042.31	2181.41	1902.92	2141.55	2165.07	2170.35	2257.43	2654.38	2736.18	2977.6	3279.38
20	1888.19	1982.46	2088.68	1848.78	2088.47	2034.42	2139.36	2168.69	2584.03	2605.33	2941.19	3181.83
LIBS signal to noise ratio of Li (I) 670.77 nm at various gas conditions
Average values of 10 shots	Gas type-1	Gas type-2	Gas type-3	Gas type-4	Gas type-5	Gas type-6	Gas type-7	Gas type-8	Gas type-9	Gas type-10	Gas type-11	Gas type-12
1	2.70595	3.14091	3.58272	3.33085	3.88911	3.74026	4.15519	4.37582	4.71474	4.9209	5.4365	5.07979
2	2.70405	3.14488	3.46279	3.38376	3.56524	3.95745	4.12605	4.31054	4.43228	4.5979	5.15086	4.80361
3	2.84017	3.14316	3.41547	3.27582	3.50499	3.75564	3.92072	4.12679	4.42388	4.45957	5.12965	4.83235
4	2.89016	3.11072	3.37208	3.29294	3.38663	3.49927	3.85153	4.00432	4.07866	4.47009	4.91735	4.83501
5	2.88639	3.19657	3.43108	3.38937	3.44788	3.47294	3.7928	3.86681	4.16073	4.25884	5.02257	4.90192
6	2.98811	3.31205	3.53411	3.36096	3.51333	3.52845	3.81964	3.86738	4.272	4.26827	4.83984	4.87363
7	3.23156	3.33025	3.55877	3.2377	3.41761	3.47559	3.72247	3.91609	4.18641	4.25009	4.8075	4.94521
8	3.0814	3.44892	3.65876	3.18876	3.48817	3.49024	3.63361	3.63473	4.20299	4.28625	4.8811	4.96248
9	3.2571	3.41205	3.69203	3.33847	3.39014	3.42586	3.59427	3.66396	4.34093	4.31773	4.89486	4.90947
10	3.23568	3.51291	3.52444	3.25051	3.46093	3.52062	3.4554	3.6409	4.31581	4.27481	4.79677	4.83362
11	3.29484	3.40531	3.57666	3.05025	3.49818	3.24314	3.4398	3.56323	4.21729	4.21678	4.5254	4.72603
12	3.20309	3.36353	3.49934	3.01541	3.22399	3.37615	3.48936	3.45216	4.00866	3.89059	4.53423	4.67116
13	3.21895	3.51852	3.52044	2.98782	3.2956	3.30508	3.45137	3.45983	3.86863	3.88252	4.28079	4.337
14	3.18406	3.29111	3.45352	2.81974	3.0912	3.17223	3.07855	3.36741	3.77598	3.7428	4.1299	4.33274
15	3.18258	3.17665	3.37558	2.9282	3.03545	3.18264	3.22966	3.20523	3.63953	3.61712	4.00584	4.24694
16	3.02793	3.23908	3.37681	2.83521	3.09682	3.06096	3.0331	3.1451	3.57259	3.75846	3.93475	4.28149
17	2.93674	3.01398	3.2249	2.7006	3.19138	2.9313	2.95316	3.01236	3.58816	3.56475	3.87588	4.18068
18	2.81168	3.01279	3.21138	2.6571	2.94723	2.7974	2.83887	2.82318	3.36881	3.56102	3.86786	4.03253
19	2.78336	2.93196	3.16688	2.56086	2.8593	2.94864	2.90152	2.84458	3.40305	3.51756	3.65499	3.93809
20	2.72942	2.91667	2.93558	2.48274	2.77026	2.64655	2.81481	2.78889	3.3203	3.3105	3.59351	3.80742

## Sheet: fig. 3
Integrated intensity (50 shots) and RSD of Li (I) 610.35 nm (a), Li (I) 670.77 nm (b) and Ca (I) 644.90 nm (c) at various gas conditions
	Li (I) 610.35 nm		Ca (I) 644.90 nm		Li (I) 670.77 nm
	Integrated intensity (cps)	RSD	Integrated intensity (cps)	RSD	Integrated intensity (cps)	RSD
Gas type-1	67359.4	0.641886	86406.3	1.26975	86680.3	1.45894
Gas type-2	70877.1	1.61285	93399.4	1.2687	98691.4	1.87738
Gas type-3	77211.4	1.20214	105361	1.28796	110952	1.45596
Gas type-4	77697.2	1.07533	108182	1.68528	109769	0.922004
Gas type-5	82519.8	0.690748	116315	1.70192	121070	1.95673
Gas type-6	85841	3.0366	121841	4.10583	127318	2.015
Gas type-7	92688	3.31583	130080	4.25119	141535	3.24714
Gas type-8	98738.8	2.86147	141226	2.62026	154372	2.08197
Gas type-9	106236	2.33595	157893	2.40165	169562	2.78549
Gas type-10	109530	3.43633	161578	4.2483	180680	4.00696
Gas type-11	128082	1.21856	184350	1.42639	214100	1.57762
Gas type-12	137922	1.98047	197915	2.28229	235239	1.64599

## Sheet: fig.4(a)
Signal enhancement factor (SEF) of elements by LA-ICPMS at various carrier gas conditions compared to pure helium
	Gas type-1	Gas type-2	Gas type-3	Gas type-4	Gas type-5	Gas type-6	Gas type-7	Gas type-8	Gas type-9	Gas type-10	Gas type-11	Gas type-12
Li	1	1.12622	0.96512	1.03176	1.09708	0.98311	1.03092	0.99065	0.96097	0.92395	0.90456	1.14173
Be	1	0.99601	0.91991	0.92985	0.94386	0.92003	0.91477	0.88004	0.91346	0.92087	0.97302	1.11032
B	1	1.16842	1.00333	1.02966	1.15307	1.10829	1.13452	0.9789	1.14526	1.04125	1.12509	1.36512
Na	1	1.01134	0.91574	0.99488	0.92987	0.90454	0.93188	0.82347	0.80199	0.83159	0.77128	0.87387
Mg	1	1.00943	0.92478	0.89521	0.90195	0.80773	0.84235	0.79285	0.7507	0.73233	0.73793	0.81583
Al	1	0.93855	0.83906	0.82946	0.8049	0.74697	0.7528	0.69983	0.69747	0.67781	0.69776	0.78054
Si	1	0.99855	0.83723	0.85446	0.8203	0.73066	0.73273	0.68614	0.63598	0.60275	0.5714	0.63469
K	1	1.07091	0.94032	0.94758	0.88987	0.85446	0.86488	0.78422	0.76303	0.72223	0.67889	0.7574
Ca	1	0.96378	0.85824	0.84495	0.80078	0.74096	0.69476	0.64135	0.63696	0.59539	0.57454	0.61129
Sc	1	0.91202	0.79528	0.75958	0.72294	0.64488	0.63256	0.58856	0.56836	0.525	0.52615	0.56703
Ti	1	0.95633	0.81726	0.78893	0.73783	0.66663	0.65606	0.59554	0.56812	0.5411	0.52989	0.54188
V	1	0.95259	0.8289	0.85072	0.8478	0.76242	0.77258	0.70055	0.66049	0.62562	0.63041	0.6294
Cr	1	1.01123	0.89631	0.89251	0.87002	0.77538	0.79266	0.75428	0.67865	0.66665	0.70628	0.71412
Mn	1	0.95054	0.85315	0.85617	0.81603	0.74875	0.75176	0.72863	0.67718	0.65953	0.63046	0.6633
Fe	1	0.9858	0.81255	0.87141	0.81494	0.72701	0.71577	0.65124	0.63178	0.60854	0.57848	0.56618
Co	1	0.96692	0.82089	0.83321	0.7929	0.70857	0.7086	0.63898	0.59074	0.54237	0.53813	0.51876
Ni	1	0.96117	0.80057	0.83118	0.79786	0.71008	0.72066	0.63572	0.59768	0.53425	0.50301	0.50766
Cu	1	0.98809	0.86311	0.8754	0.78336	0.69377	0.67304	0.6367	0.53358	0.50511	0.47071	0.4975
Zn	1	1.07018	0.92131	0.93846	0.95716	0.89159	0.89072	0.83985	0.76354	0.72932	0.69118	0.79448
Ga	1	1.03466	0.86471	0.93197	0.94035	0.87926	0.87785	0.85094	0.79177	0.75722	0.73096	0.81655
Ge	1	0.97456	0.83978	0.88314	0.90971	0.80152	0.80918	0.75586	0.71952	0.69229	0.63867	0.70639
As	1	1.00337	0.84277	0.74112	0.85683	0.80349	0.78262	0.69998	0.69715	0.64003	0.62055	0.66
Se	1	1.02818	0.84274	0.72191	0.90522	0.81348	0.79644	0.66895	0.69495	0.66027	0.65511	0.75588
Rb	1	1.02637	0.8708	0.95436	0.88802	0.84488	0.88462	0.75035	0.73025	0.70988	0.67891	0.73923
Sr	1	0.93915	0.81605	0.81206	0.76937	0.70469	0.68227	0.62016	0.59924	0.55391	0.55775	0.56008
Y	1	0.88014	0.75433	0.70897	0.67699	0.60532	0.60113	0.54085	0.55189	0.51	0.50495	0.53127
Zr	1	0.85751	0.75028	0.69594	0.64838	0.57503	0.57052	0.52851	0.4953	0.46895	0.4728	0.4911
Nb	1	0.88866	0.78288	0.72878	0.7001	0.60728	0.59952	0.53787	0.49507	0.45722	0.44434	0.45726
Mo	1	0.97076	0.8274	0.8262	0.83102	0.75809	0.74914	0.67302	0.63165	0.58275	0.58837	0.60728
Rh	1	1.04225	0.90348	0.77758	0.85123	0.83178	0.80283	0.61313	0.70752	0.47106	0.33045	0.60237
Ag	1	0.99568	0.85356	0.85054	0.88389	0.79776	0.76218	0.69994	0.7014	0.63051	0.60016	0.68909
Cd	1	0.98002	0.88042	0.86632	0.90043	0.85245	0.87931	0.765	0.81163	0.7934	0.72159	0.82476
In	1	1.01287	0.8892	0.88457	0.94155	0.87303	0.89862	0.82161	0.797	0.76765	0.74367	0.86678
Sn	1	1.08212	0.92244	0.97938	0.96678	0.85875	0.87747	0.8085	0.77226	0.77027	0.78724	0.85468
Sb	1	1.0498	0.93959	0.93486	1.00021	0.90576	0.91792	0.88748	0.9079	0.84615	0.83286	0.96363
Te	1	1.05861	0.89235	0.77413	1.04322	0.99294	1.04123	0.83467	0.95234	0.85235	0.84774	0.94754
Cs	1	0.98626	0.87317	0.84884	0.96726	0.86313	0.82544	0.76997	0.74389	0.72091	0.68493	0.79066
Ba	1	0.94049	0.84507	0.8311	0.81857	0.73418	0.74582	0.66277	0.655	0.62316	0.59483	0.6178
La	1	0.92619	0.81498	0.75632	0.73596	0.66157	0.63872	0.6048	0.57377	0.5283	0.54228	0.53814
Ce	1	0.97568	0.90572	0.86553	0.85985	0.76624	0.76737	0.70337	0.68098	0.63013	0.62572	0.65157
Pr	1	0.95538	0.86456	0.81253	0.79622	0.74079	0.71862	0.66549	0.66041	0.61728	0.61158	0.643
Nd	1	0.94469	0.83774	0.77579	0.78063	0.6975	0.69804	0.65048	0.64263	0.60076	0.61505	0.66438
Sm	1	0.9218	0.82552	0.77309	0.78314	0.68088	0.68288	0.64523	0.63529	0.61928	0.59139	0.66545
Eu	1	0.97262	0.85139	0.80076	0.81765	0.73891	0.72673	0.67664	0.6669	0.6545	0.64536	0.69219
Gd	1	0.90585	0.78695	0.74501	0.7332	0.65764	0.64893	0.61787	0.59298	0.56143	0.57683	0.62641
Tb	1	0.93018	0.81796	0.77341	0.7812	0.70633	0.67276	0.6567	0.63632	0.62724	0.63901	0.69114
Dy	1	0.93585	0.82789	0.75458	0.77322	0.70858	0.6939	0.64033	0.6747	0.6433	0.67522	0.72377
Ho	1	0.92935	0.81794	0.76451	0.77594	0.69208	0.68964	0.66857	0.67987	0.65728	0.68048	0.72728
Er	1	0.94195	0.82394	0.76825	0.76717	0.70292	0.71496	0.68358	0.68686	0.63396	0.68586	0.75547
Tm	1	0.93866	0.8177	0.78254	0.78586	0.70463	0.69629	0.70035	0.684	0.65341	0.69712	0.75001
Yb	1	0.94209	0.82821	0.78284	0.80476	0.73517	0.72426	0.71751	0.71787	0.66961	0.7002	0.77756
Lu	1	0.93539	0.81916	0.77476	0.79373	0.70409	0.72521	0.68546	0.71055	0.67507	0.71565	0.76883
Hf	1	0.93848	0.83474	0.77109	0.8054	0.70836	0.6995	0.68281	0.69683	0.63854	0.67588	0.75093
Ta	1	0.93308	0.81642	0.76192	0.76258	0.68446	0.69697	0.63503	0.64398	0.63219	0.63038	0.67431
W	1	1.06309	0.91212	0.91062	0.98842	0.87596	0.93372	0.84631	0.8377	0.76043	0.75698	0.88494
Pt	1	1.11515	0.94018	1.18474	0.98816	0.79156	0.8745	1.29451	0.8852	1.05306	1.80706	1.00866
Au	1	1.02384	0.8533	0.75317	0.91611	0.85566	0.84369	0.7055	0.70844	0.55581	0.5324	0.66046
Tl	1	1.07176	0.95043	0.92381	1.06947	1.06203	1.09162	1.09808	1.15362	1.01989	1.0252	1.30618
Pb	1	1.08277	0.99429	0.97384	1.07332	0.98787	1.02972	0.97241	1.01222	0.92914	0.9688	1.12747
Bi	1	1.06776	0.95193	0.97238	1.06947	0.99427	0.9984	0.98308	1.00169	0.92911	0.91491	1.16577
Th	1	0.97329	0.86221	0.81515	0.853	0.76608	0.78438	0.77192	0.76663	0.74711	0.82059	0.9102
U	1	1.14844	1.05497	1.08158	1.14196	1.17822	1.16026	1.14437	1.2021	1.12079	1.16029	1.47739

## Sheet: fig.4(b)
Ca-normalized fractionation indices (FIs) of elements by LA-ICPMS at various carrier gas conditions
	Gas type-1	Gas type-2	Gas type-3	Gas type-4	Gas type-5	Gas type-6	Gas type-7	Gas type-8	Gas type-9	Gas type-10	Gas type-11	Gas type-12
Li	1.15426	1.09445	1.04964	1.11983	1.12103	1.0859	1.02636	1.05416	1.07769	1.06545	1.03969	1.0555
Be	0.990625	1.02265	0.974987	1.0118	1.03324	1.05268	0.961023	0.971251	1.02068	0.925322	1.02105	0.975895
B	1.08253	1.07032	1.03643	1.05346	1.07725	1.10835	1.09246	1.15902	1.09288	1.08009	0.995995	1.16317
Na	1.09092	1.06369	1.06895	1.04733	1.09624	1.09782	1.2292	1.11065	1.15713	1.14907	1.08754	1.14899
Mg	1.03411	1.0295	0.999075	0.982806	1.04098	1.10781	1.09105	1.06062	1.05712	1.02265	1.02974	1.01405
Al	1.02008	0.988011	0.979834	0.96537	0.987314	0.994531	0.954826	0.985888	0.984723	1.00296	1.00128	0.946916
Si	1.11246	1.04296	1.0395	1.02082	1.04764	1.1138	1.06389	1.02368	1.09487	1.00255	1.08644	1.05621
K	1.04581	1.15899	1.05024	1.04805	1.09963	1.06537	1.12091	1.06599	1.11676	1.08073	1.06071	1.12334
Ca	1	1	1	1	1	1	1	1	1	1	1	1
Sc	0.999922	0.977809	0.975607	0.941454	1.00852	0.982231	0.978967	0.956308	0.992925	0.916965	1.00917	1.01376
Ti	1.03186	1.04175	1.04883	0.984162	1.00742	1.04719	1.00474	1.07004	1.04663	1.0088	0.988713	0.997127
V	1.14648	1.14028	1.08294	1.06916	1.0377	1.17281	1.18361	1.11584	1.04727	1.0513	1.09368	1.29373
Cr	1.14433	1.14684	1.06422	1.06708	1.09716	1.10412	1.10599	1.08251	1.1488	1.08633	1.02343	1.17683
Mn	1.05224	1.06008	1.06623	1.00133	1.04033	1.05138	0.977294	0.985014	1.0108	1.0011	1.07709	1.02987
Fe	1.05705	1.02641	0.974839	0.966038	0.970105	1.06746	1.07492	1.02947	1.06858	0.982168	1.02466	1.15214
Co	1.1066	1.11205	1.02211	1.02195	1.10977	1.10297	1.1234	1.08294	1.1424	0.977719	1.0293	1.10378
Ni	1.07808	1.11241	1.03756	0.997665	1.11792	1.20038	1.06036	1.11171	1.12019	1.08038	1.06712	1.07976
Cu	1.07902	1.09011	1.11209	1.02402	1.04353	1.10057	1.04711	1.0609	1.13977	0.94312	1.08616	1.03296
Zn	1.14835	1.13338	1.08086	0.975815	1.12251	1.06937	1.08665	1.09199	1.16966	1.07115	1.08332	1.12092
Ga	1.15361	1.05264	1.07442	0.985759	1.07365	1.05982	1.0446	1.12437	1.01494	1.04411	1.07451	1.07417
Ge	1.08319	1.04241	1.07558	0.973136	1.09645	1.17102	1.02356	1.11434	1.10077	1.13876	1.07032	1.14639
As	1.09112	1.09154	1.11313	1.03465	1.09942	1.16776	1.11545	1.11098	1.08799	1.09055	1.12715	1.17093
Se	0.93982	0.945383	0.915145	0.947558	0.968997	1.09843	1.06202	1.09598	1.04043	0.889025	1.04253	1.15961
Rb	1.12346	1.13488	1.09609	1.02005	1.07354	1.16234	1.1477	1.1604	1.11168	1.13534	1.03774	1.18868
Sr	1.03822	0.984257	0.987293	0.963053	1.01485	0.976397	0.998227	1.00815	0.997012	0.956822	1.00766	1.01298
Y	0.988374	0.98423	0.966547	0.947651	0.981132	0.999528	0.973149	1.0327	0.925045	0.937469	0.921638	1.0312
Zr	0.984856	0.96074	0.957693	0.939449	0.998181	1.02492	0.970661	0.981783	0.901078	0.920478	0.905934	0.968387
Nb	1.02775	1.00309	1.0061	0.955267	1.00528	1.04251	1.02812	1.02882	0.988921	0.961854	1.02157	1.05785
Mo	1.19003	1.09227	1.09398	0.958911	1.02437	1.25742	1.1204	1.25935	1.06849	1.05577	1.05764	1.22258
Rh	1.24241	1.13323	0.988057	0.983292	1.12748	1.15733	1.18962	1.18002	1.04942	1.20295	1.07396	1.15503
Ag	1.15694	1.06905	0.996368	0.978493	0.978451	1.08126	1.11299	1.09085	1.03321	1.02124	1.02569	1.212
Cd	1.20117	1.11972	1.09842	1.02567	1.09713	1.20934	1.14024	1.23971	1.07048	0.924359	0.954264	1.07242
In	1.14719	1.06678	1.08775	1.01943	1.06296	1.19162	1.09754	1.18919	1.1182	1.13083	1.0671	1.12741
Sn	1.19054	1.1337	1.10213	1.01006	1.02573	1.17745	1.06122	1.14901	1.04002	1.09697	1.05175	1.20285
Sb	1.17433	1.06861	1.09355	1.0223	1.04409	1.086	1.00563	1.1535	1.11549	1.09636	0.978346	1.15405
Te	1.13113	1.09749	1.07271	0.956741	0.96615	1.02993	1.04026	1.09384	0.977561	0.965188	0.945199	1.23674
Cs	1.26655	1.068	1.12911	1.06659	1.11461	1.19625	1.07899	1.11449	1.05919	1.19392	0.979473	1.29559
Ba	1.05171	1.02826	1.0118	0.989647	0.990759	1.12998	1.01799	1.0345	1.00391	1.0313	0.970984	1.1292
La	1.01868	0.97403	0.960355	0.960785	0.974804	1.00332	1.00817	1.03348	0.998305	0.914874	0.907824	1.03891
Ce	1.03816	1.03038	1.04842	1.00708	1.00328	1.09622	0.996923	1.04126	1.05418	0.974372	1.0044	1.12684
Pr	0.998512	1.00796	1.01773	0.982317	0.982047	1.09194	0.959605	1.01533	0.977201	0.950804	0.992439	1.1275
Nd	1.02573	0.998164	1.0181	0.976942	1.00322	1.07435	0.973144	0.994762	0.994688	0.923122	0.9689	1.01443
Sm	1.00725	1.00149	0.989816	0.958983	0.985558	1.04565	0.977333	1.04279	1.00602	0.950242	0.971633	1.10017
Eu	0.999173	0.987914	1.00918	0.946808	0.996501	1.03125	1.00054	1.03016	1.01275	0.99389	0.939568	1.0808
Gd	0.971159	0.978728	0.975145	0.987381	0.988651	0.991785	0.991414	1.00501	1.00519	0.961649	0.921549	1.07164
Tb	0.973561	0.97851	0.983068	0.951097	0.996006	0.992909	0.963974	1.04095	0.952059	0.906716	0.972064	1.11693
Dy	0.957925	1.01789	1.01305	0.982955	0.99896	1.02844	0.977218	0.971046	0.996782	0.972586	0.971632	1.15541
Ho	0.97642	0.96427	0.988112	0.982692	0.982137	1.01039	0.957419	1.00561	0.920915	0.925147	0.971953	1.03264
Er	0.982943	0.961374	0.981463	0.96082	0.971699	1.03999	0.937378	1.0176	1.02096	0.882826	0.973204	1.0512
Tm	0.978405	0.949183	0.981835	0.934212	0.991818	1.01364	0.947027	1.02044	0.998901	0.932854	0.958435	1.12084
Yb	0.99787	0.989836	0.986367	0.980847	0.984362	1.00061	0.977037	0.977166	0.946518	0.883184	0.947792	1.13535
Lu	0.982508	0.969639	0.949991	0.960911	0.971269	0.980013	0.960921	1.00892	0.94808	0.899633	0.948127	1.0954
Hf	0.955616	0.965668	0.982333	0.950155	0.96139	1.01227	0.935074	1.03809	0.941607	0.961547	0.991569	1.13995
Ta	0.988569	0.97919	1.00468	1.01479	0.982467	1.03064	0.986769	1.02708	1.00159	0.935738	0.962114	1.1647
W	1.18417	1.14561	1.13447	1.0902	1.07298	1.10836	1.15639	1.22862	1.06158	1.00625	1.02354	1.30639
Pt	1.1645	1.10139	1.20173	0.944793	1.01758	1.21987	1.0398	1.19923	0.957573	0.955374	1.08863	1.41714
Au	1.15462	1.03591	1.09456	1.06508	1.07251	1.07164	1.05768	1.11279	1.14671	1.1038	1.11146	1.4709
Tl	1.12834	1.08593	1.06431	0.961123	0.943924	1.05345	1.01314	1.08032	1.0144	0.974272	1.01405	1.32763
Pb	1.1182	1.11179	1.10335	0.973423	0.992764	1.07552	1.06362	1.15732	1.17661	1.07736	1.07501	1.41892
Bi	1.16041	1.05075	1.02744	1.02323	0.968498	1.09316	1.04384	1.14289	1.02574	1.02896	1.04146	1.33106
Th	0.971582	0.983161	0.951175	0.977747	0.969485	0.980651	0.951617	1.0351	1.00898	0.941725	0.993519	1.14603
U	1.17544	1.19989	1.03747	1.1552	1.17387	1.3148	1.1384	1.31338	1.20146	1.13233	1.17551	1.45495

## Sheet: fig.5
Relative deviation and relative standard deviation of elements by LA-ICPMS at various carrier gas conditions
	Relative deviation (N=4)														Relative standard deviation (N=4)
	Gas type-1	Gas type-2	Gas type-3	Gas type-4	Gas type-5	Gas type-6	Gas type-7	Gas type-8	Gas type-9	Gas type-10	Gas type-11	Gas type-12			Gas type-1	Gas type-2	Gas type-3	Gas type-4	Gas type-5	Gas type-6	Gas type-7	Gas type-8	Gas type-9	Gas type-10	Gas type-11	Gas type-12
Li	-5.00094	-2.89648	-5.9909	-6.05231	-4.15617	-4.55938	-1.63832	-3.006	1.79039	-2.23025	0.85424	0.08398		Li	1.82233	2.26966	1.63195	3.55319	2.40796	0.8494	1.42035	5.5054	3.762	1.77656	4.20456	3.37346
Be	-4.23074	-6.78419	-4.81847	-6.48977	-5.94117	-5.00001	-1.07422	-5.78956	-6.39328	-6.09246	-4.44257	-5.02228		Be	0.26757	4.1986	3.12675	1.26061	0.32604	1.71522	0.96446	1.59042	3.06472	2.95982	1.17416	1.10056
B	-7.59818	-0.30214	-8.26193	-4.92866	-4.44009	-3.18477	0.3271	-2.22746	2.75442	4.92838	3.95534	0.39497		B	3.59426	2.80824	1.75485	2.72493	3.60176	1.59919	2.32039	5.79149	1.20599	2.83887	3.7181	3.59195
Na	-5.22557	-0.50656	-5.67687	-0.56493	-0.89108	-2.05567	4.40983	2.61154	-0.21207	3.29012	3.98556	4.53971		Na	1.52236	1.53872	1.63586	2.07138	4.06092	4.65861	1.42058	2.57061	3.78589	4.85528	3.22719	3.06319
Al	1.02545	1.07249	0.84468	1.78133	-0.70556	-1.69275	1.11696	-1.58989	-0.85944	-0.83136	-1.31485	-1.04025		Al	0.65427	2.0391	0.60379	0.75793	2.51155	1.87015	1.90267	1.40751	3.20475	1.45983	0.86525	1.42928
Si	-6.19265	-2.97541	-7.46616	-4.60323	-1.09065	-4.30866	2.52115	-2.22937	1.48809	1.02445	-1.13929	-1.41814		Si	1.34887	1.3561	1.40919	0.96737	1.34011	3.24719	1.38031	2.87484	3.01577	0.87378	1.44022	2.53642
K	-4.78072	-1.9644	-5.11203	0.3312	-0.60006	-3.46481	2.6639	0.40163	-1.9321	1.67246	-4.57906	-1.90502		K	2.0995	2.14824	0.97236	4.13667	2.95202	0.95009	5.95147	4.83728	5.32066	2.33112	5.84843	3.26217
Sc	-10.2228	-9.8932	-9.45556	-10.7507	-10.4278	-11.5829	-10.3538	-11.9937	-12.3706	-11.7794	-12.6308	-10.5756		Sc	1.27658	1.14019	0.9831	1.52427	0.88916	1.48946	2.48147	0.6723	0.27552	1.18886	2.53876	3.4625
Ti	10.2611	12.9834	10.0189	6.54111	11.6063	10.1929	13.9876	8.3343	8.97833	16.4563	14.0712	15.3606		Ti	2.27488	1.20779	1.25215	1.44016	1.22435	1.00248	1.74004	2.98143	3.89219	1.39743	2.06945	2.27277
V	-5.64093	-2.78616	-7.18626	-5.36601	-1.84592	-1.72109	0.53168	-0.04543	1.61035	-0.15645	2.98159	2.05131		V	1.52333	2.33157	2.55865	2.63705	2.30247	3.98273	3.09893	3.74151	4.98181	2.21705	5.22295	1.17165
Cr	-4.62925	-2.46176	-6.06367	-4.53895	2.19677	0.48986	2.90753	4.18281	0.78173	6.81003	4.42725	9.36185		Cr	2.41536	1.4734	0.95624	1.35956	3.02189	5.00023	1.89586	2.83829	5.46234	2.45787	3.52728	4.45043
Mn	-2.88481	-1.22656	-1.72783	-1.78036	-0.83938	-0.12178	0.57134	3.15799	4.27707	2.76697	2.56959	1.82058		Mn	1.4651	1.90637	1.32468	3.26615	2.54758	4.43167	1.51167	4.79272	1.12175	2.38893	2.7416	2.12055
Co	-4.08016	-1.69797	-5.76849	-3.3665	-2.03238	-4.11962	4.03958	3.62453	2.79759	-0.45872	6.55576	5.67669		Co	1.54969	1.15843	1.4195	0.95697	2.18491	1.33135	2.95282	3.5977	2.20247	2.34955	1.42342	1.50666
Ni	-6.41421	-3.28078	-7.62274	-4.39608	-3.3979	-5.10764	1.60429	-0.12724	2.24096	-0.03621	4.09405	2.49262		Ni	2.91469	2.52624	1.9208	2.39597	1.49698	1.62006	1.46663	1.03626	1.62243	1.81215	2.23882	0.96876
Cu	-3.16637	0.20954	-3.65634	0.91742	5.22389	4.98698	7.11302	1.12056	-2.99925	-1.12819	1.53349	0.28136		Cu	0.93726	3.65768	3.96338	1.51078	8.45852	5.77648	4.89598	3.5702	1.43579	2.63526	1.87835	3.38383
Zn	-3.18577	3.22218	-1.45166	1.83101	2.29514	1.80902	7.48348	12.0894	3.86005	2.09241	7.43462	6.81018		Zn	0.41432	2.90834	1.46092	1.65632	4.21967	1.28155	2.44418	6.54831	2.63663	2.34874	3.22153	2.26152
Ga	-3.18039	0.61685	-4.87704	0.56282	-0.04791	0.81752	3.6159	3.41819	4.44752	3.63436	7.67711	5.42975		Ga	1.00228	0.51029	1.62414	1.84564	2.75018	1.78163	1.62021	5.28811	3.25986	1.6928	2.00525	4.69751
Ge	-10.4312	-5.91309	-13.2248	-6.90816	-6.32891	-6.00494	-2.8243	-3.12184	-5.51065	-1.41482	0.43034	-0.73635		Ge	1.22345	4.28859	1.60723	2.92113	3.72067	8.33942	1.4759	3.17063	5.11859	4.31189	3.15583	0.80684
As	-1.5718	9.13996	2.70194	-1.66854	6.14957	3.96017	13.2255	6.30985	13.5155	11.7102	9.28599	13.7097		As	3.23028	2.31289	1.16291	5.08005	5.33753	3.82949	6.25558	5.42065	3.09871	2.83066	2.20462	5.05272
Rb	-6.48333	-3.38927	-10.0988	-4.33044	-2.62054	-3.23276	2.52213	-1.288	-0.20508	-1.33721	0.03443	-2.57066		Rb	1.74196	2.22668	5.47399	3.32882	3.25606	2.20489	2.83662	2.92511	6.23058	3.75619	4.86828	2.10252
Sr	-0.61606	-0.20469	0.03135	0.42554	-1.68382	0.5399	2.4833	-1.09754	-0.42452	-1.6314	0.88713	2.37908		Sr	0.84879	1.904	1.72808	1.26198	0.99131	0.87258	0.86693	2.68179	2.55252	1.83719	2.27006	2.79162
Y	7.67882	8.74362	8.13378	7.07692	5.37459	2.86278	6.75187	3.65925	2.57303	3.81996	-1.19332	2.51478		Y	1.17515	1.2761	0.63933	0.49595	1.73001	1.5647	1.626	1.04081	2.56476	2.38004	2.10513	2.43146
Zr	7.12971		7.20444	3.65825	4.37116		5.19644	1.98955	3.03123	-0.19442	-1.36345	0.29532		Zr	1.36984		2.12771	0.7299	1.19883		1.16453	0.64214	3.38772	1.51269	2.2982	2.08862
Nb	1.15652	1.0703	0.53701	0.84597	1.46964	1.79922	3.07285	-0.08601	0.55659	-0.10705	-0.07188	-0.33642		Nb	0.66263	1.59902	0.78111	0.5638	1.8312	1.34905	2.15484	2.0387	3.49582	1.10961	2.97805	2.74858
Mo	-3.76211	0.50799	-4.89439		-0.00939	-0.72068	4.72266	1.28339	-0.34618		0.1162	8.13582		Mo	3.55768	2.62704	1.62827		3.44437	1.47456	1.37721	5.88557	6.90569		3.12447	2.0504
Ag	-0.58639	5.91684	3.95321	8.63004	13.7065	11.2645	15.988	10.8703	10.8078	13.28	12.0872	14.6654		Ag	1.5041	2.55947	3.18497	1.40179	2.94706	1.77385	4.8618	4.6799	1.40764	3.10213	3.15821	2.84345
Cd	-11.2702	-6.78451	-4.54827	-6.87702	-5.07787	-2.43782	-4.73658	-2.33999	-2.84809	-5.99665	-6.17224	3.33287		Cd	2.55761	2.69432	3.19156	2.43493	2.38003	2.30386	1.30731	3.91327	5.48637	3.48654	1.33945	2.66811
In	2.58687	8.22215	4.28087	4.64543	7.21593	6.7487	16.3673	13.4568	10.6122	12.9986	15.1697	15.2177		In	0.31657	2.43654	3.09657	2.8115	1.1689	2.70641	1.56145	2.61548	1.69915	2.1311	3.74377	4.5311
Sn	-4.29447	3.51627	-2.67185	2.37989	4.70784	2.11657	5.4927	10.2104	4.97466	8.75157	9.8783	10.7303		Sn	1.74653	1.06506	4.17531	2.65065	1.57957	4.23907	1.8445	3.54072	3.61358	3.5509	4.84399	2.22638
Sb	0.08739	5.7764	1.21642	1.19851	9.04426	7.55899	12.2159	12.9827	12.0068	12.7048	12.6164	10.49		Sb	1.29326	2.26112	3.71001	1.48078	2.38705	2.89388	4.70662	2.16274	2.16823	1.17536	1.87485	2.26972
Cs	-4.87867	0.96517	-8.19478	-5.72971	2.0631	0.16503	1.62126	-0.24348	2.30725	0.72898	0.64519	5.83603		Cs	1.46066	3.60534	1.55769	4.32862	2.32184	3.55432	2.95089	1.79234	5.30041	2.70828	3.33803	0.74294
Ba	-1.17237	-0.63399	-1.86354	-0.9596	0.38616	-2.00495	4.98109	-2.7891	2.30735	-0.68899		1.78035		Ba	1.62895	2.27591	0.65087	3.61718	1.69071	1.43259	1.24865	6.13585	2.79294	1.75147		3.73253
La	2.52088	3.53295	2.76972	2.5974	3.00675	-0.41473	6.51303	-1.4343	0.29717	0.68979	0.38761	0.55636		La	1.30371	1.34793	1.53141	1.71625	1.25012	1.50391	1.97078	1.92986	4.10921	3.27191	1.57517	2.25921
Ce	-3.25541	-2.58106	-2.62843	-2.02398	0.8841	-3.83638	3.401	-1.94171	2.64013	-2.49071	2.29672	2.81488		Ce	1.6968	0.56867	1.40639	1.58206	2.02644	2.35703	0.96483	2.98564	2.09409	1.9459	1.51481	1.25737
Pr	-0.04328	0.46165	0.42767	0.86598	0.51152	-0.95885	0.92625	-1.90654	1.52911	0.28693	-0.68148	2.3639		Pr	1.96505	1.28087	0.84391	1.10669	0.94032	1.28549	2.14092	0.68127	3.60671	0.78417	1.96815	2.30829
Nd	3.70842	2.87196	4.74704	2.41819	4.87154	0.10508	3.77336	-0.54724	1.4202	2.22837	0.22608	0.97661		Nd	0.99178	1.49249	1.36492	3.03237	1.03136	1.01703	1.4574	1.44241	2.04402	2.2103	1.9771	2.75953
Sm	3.35948	4.46448	5.50315	3.84835	4.33282	-0.8598	5.69357	0.07849	2.4751	0.12515	1.23018	-1.03653		Sm	0.92199	1.34235	1.17051	1.94698	2.48375	2.85579	0.96693	0.82488	1.73068	3.04402	1.71687	2.63986
Eu	2.41157	2.07845	2.90426	1.62901	1.50757	1.06954	5.20902	-1.29027	0.54735	1.36771	-0.1443	0.46321		Eu	1.91772	1.54695	2.35652	1.54656	1.25476	1.46947	2.32177	1.75653	3.8653	2.88572	3.71171	2.4862
Gd	7.37731	4.86296	7.48095	6.09243	7.04802	3.40141	7.18242	1.48935	-0.35016	2.70571		-0.63655		Gd	1.64815	2.41461	2.16538	1.32225	1.11936	1.66348	3.3122	2.43402	4.95783	2.44051		1.70145
Tb	9.14678	9.19851	10.4714	8.65533	9.36285	7.00495	8.89841	4.98742	2.15028	7.22721	2.09824	5.57644		Tb	1.05413	1.20098	0.97122	1.33574	1.55364	1.274	1.76668	0.42392	2.68038	1.11975	1.89739	1.85289
Dy	8.39335	8.14435	8.27309	6.64374	6.89403	3.49356	9.63492	2.28241	1.01381	5.38669	1.45595	3.6092		Dy	1.47587	1.00181	1.38301	1.81323	1.27029	0.80163	1.34644	3.08793	1.54298	1.77754	2.61472	4.06975
Ho	10.5144	8.16169	10.3442	7.96675	8.95808	6.53713	9.9991	2.98446	3.92201	7.39108	3.11688	3.35976		Ho	1.38989	1.27938	1.08448	1.15796	1.11332	1.07321	2.39954	2.38762	2.67946	1.03654	1.54669	2.30629
Er	9.31926	8.3386	8.48256	5.67938	7.89339	3.82191	8.95425	2.11375	0.40586	3.14861	-1.57329	3.66389		Er	1.26255	1.35089	0.86791	1.90395	1.57367	1.57088	2.52001	2.83618	3.12154	1.49046	2.53516	3.47353
Tm	9.80003	8.10176	9.84171	8.59084	7.96565	3.7065	8.74135	3.55476	1.70337	2.10567	0.33292	4.11722		Tm	0.48055	1.79569	0.61237	0.7641	1.18519	1.38506	1.29647	4.52756	3.25074	1.76105	3.64043	2.72266
Yb	12.3947	12.5485	11.5465	11.2791	13.0098	7.67113	11.6497	7.10434	7.56715	8.7496	3.42989	7.05019		Yb	1.19676	1.91386	0.40074	1.54276	0.35534	2.64649	1.94665	3.48682	0.85954	1.71916	2.56512	4.0415
Lu	9.92185	8.47465	9.61054	8.43178	8.31292	4.50548	10.1125	3.20886	3.01194	2.58733	-0.71862	4.21317		Lu	1.07027	1.44184	0.64926	1.79625	1.0568	2.3709	1.4168	1.24141	2.01894	0.62012	1.77665	2.08746
Hf	8.20968	9.83335	8.0087	4.97542	8.38631	5.72702	3.78924	-0.58664	1.35639	-0.5609	1.3521	-1.68565		Hf	1.31781	1.53078	1.25438	2.25061	1.56326	1.94833	1.19577	0.52861	3.26122	1.96158	3.98726	2.3941
Ta	6.60037	4.95688	5.92666	2.96556	3.70343	1.95646	4.27527	-0.98998	1.56183	2.62847	0.16626	1.40338		Ta	1.47351	1.67076	0.37207	1.66541	0.67508	2.76719	2.61749	2.24871	0.62451	0.68786	2.44552	2.05139
W	-5.5898	-2.51316	-6.99333	-4.93824	-3.27487	-0.70854	3.5363	0.67413	0.97488	1.08858	2.53698	1.99085		W	2.59129	3.58078	2.07417	0.64632	2.53957	3.55628	0.60642	3.4022	5.61702	4.03996	3.28438	3.81637
Au	-1.89158	3.32322	-5.92828	-6.65448	5.16119	2.71811	1.09535	1.23576	4.26047	-9.58159	3.6713	-2.188		Au	2.37319	2.07154	4.46504	2.79359	6.00016	4.83766	3.77233	2.35501	2.66109	8.54848	1.95548	7.17632
Tl	-18.6596	-21.2575	-20.3351	-19.7689	-11.8309	-9.44532	-8.11859	-4.12854	-3.10849	-5.98538	-3.05693	-1.97081		Tl	3.85046	2.11334	3.53299	3.08999	2.77678	2.628	5.09265	1.39565	4.66428	2.05811	3.71569	2.31983
Pb	-0.30684	2.66158	0.6141	3.84066	6.53803	4.22091	11.7453	6.41627	10.408	7.47864	9.94026	11.5029		Pb	1.69195	1.55434	1.89368	0.71083	2.42192	1.66974	3.56099	2.38717	4.90269	2.09714	2.68887	3.20589
Bi	-9.88175	-4.9283	-9.08058	-6.05265	-2.06375	-1.24099	-2.16066	0.64262	1.29847	-1.17104	-0.23072	1.51228		Bi	2.70953	2.73609	3.53984	1.74004	2.45084	2.97431	0.99375	1.79941	4.36535	1.22076	0.59173	2.09184
Th	7.19625	4.941	7.91057	5.72283	4.60159	2.842	6.95161	0.76697	1.9203	1.40535	0.04035	3.55489		Th	2.28761	2.01845	1.78089	2.20669	1.49334	2.47447	0.68308	2.83024	1.9158	0.32312	0.38824	3.24862
U	-4.83331	-2.21581	-3.60197	-2.77012	1.05676	2.89749	7.80312	5.97916	8.68479	8.46883	9.87029	8.69318		U	1.54753	3.07326	2.87737	2.42767	1.40173	1.61033	2.54442	3.05792	3.11621	2.75878	4.14858	6.80521

## Sheet: fig.6
Signal enhancement factor (SEF) for both LIBS and LA-ICP-MS at various carrier gas conditions, relative to pure helium.
	Gas type-1	Gas type-2	Gas type-3	Gas type-4	Gas type-5	Gas type-6	Gas type-7	Gas type-8	Gas type-9	Gas type-10	Gas type-11	Gas type-12
Li (I) 670.77 nm_LIBS	1	1.23713	1.42634	1.44327	1.61188	1.72258	1.9366	2.14478	2.40467	2.56813	3.11404	3.45627
Ca (I) 644.90 nm_LIBS	1	1.11954	1.31218	1.36429	1.51175	1.60107	1.74572	1.90778	2.16972	2.21615	2.63953	2.79263
Li_LA-ICPMS	1	1.09366	0.92825	1.00781	1.04976	0.94664	0.98235	0.9475	0.92004	0.89303	0.88103	1.10701
Ca_LA-ICPMS	1	0.95727	0.85554	0.84205	0.7955	0.73291	0.68992	0.63707	0.62853	0.59225	0.57359	0.61062
Zn_LA-ICPMS	1	1.04987	0.90377	0.90183	0.92435	0.8613	0.86164	0.81395	0.74119	0.70938	0.68011	0.77217
La_LA-ICPMS	1	0.91558	0.80682	0.74852	0.72435	0.65095	0.63156	0.59745	0.5673	0.52224	0.53616	0.52838
